# Supplementary material for: A Missense Mutation in POU4F3 Causes Midfrequency Hearing Loss in a Chinese ADNSHL Family
Source: Hindawi journal article supplement (doi:10.1155/2018/5370802), 2018-01-01
Supplement: f1 [file 5370802.f1.pdf]

## Supplemental table 1

## 129 deafness genes

|          |          |         |           |          |          |
|----------|----------|---------|-----------|----------|----------|
| ACTB     | FGF3     | MYO15A  | SPINK5    | MTTS2    | MSRB3    |
| ACTG1    | GATA3    | MYO1A   | STRC      | MTTL2    | NDP      |
| ATP6V1B1 | GJA1     | MYO1C   | TBL1X     | FGFR3    | SNAI2    |
| BCS1L    | Gjb1     | MYO1F   | TCF21     | mir96    | SERPINB6 |
| BSND     | GJB2     | MYO3A   | TECTA     | mir182   | SIX1     |
| CATSPER2 | GJB3     | MYO6    | TFCP2     | mir183   | SIX5     |
| CCDC50   | GJB4     | MYO7A   | TIMM8A    | GRXCR1   | TPRN     |
| CDH23    | GJB6     | NR2F1   | TMC1      | USH2C    | FAS      |
| CLDN14   | GRHL2    | OTOA    | TMIE      | USH2A    | EDNRA    |
| COCH     | GSTP1    | OTOF    | TMPRSS3   | USH1G    | EDNRB    |
| COL11A2  | JAG1     | OTOR    | TMPRSS5   | USH3A    | MITF     |
| COL9A3   | KCNE1    | PAX3    | TRIOBP    | HGF      | ECE1     |
| CRYM     | KCNJ10   | PCDH15  | USH1C-a-b | TJP2     | FKH10    |
| DFNA5    | KCNQ4    | PDZD7   | WFS1      | FOXI1    | PTPRQ    |
| DFNB31   | KIAA1199 | PMP22   | MTTL1     | ATP6V1B2 |          |
| DFNB59   | LHFPL5   | POU3F4  | MTTI      | PRPS1    |          |
| DIAPH1   | LHX3     | POU4F3  | MTTQ      | SMPX     |          |
| DSPP     | LRTOMT   | RDX     | MTTM      | COL9A2   |          |
| ERCC2    | MARVELD2 | SLC17A8 | P2RX2     | KCNQ1    |          |
| ERCC3    | MTAP     | SLC26A4 | MTTS1     | CEACAM16 |          |
| ESPN     | LOXHD1   | SLC26A5 | MTTD      | GIPC3    |          |
| ESRRB    | MYH14    | SLC4A11 | MTTK      | GPSM2    |          |
| EYA4     | MYH9     | SOX2    | MTTH      | ILDR1    |          |

| Gene     | NCBI Reference | OMIM   | Description                                                                           | CDS bps | # of Exons | Covered Region             | AD* | AR* | X* | Syn.* |
|----------|----------------|--------|---------------------------------------------------------------------------------------|---------|------------|----------------------------|-----|-----|----|-------|
| ACTB     | NM_001101.3    | 102630 | Actin $\beta$                                                                         | 1852    | 6          | CDS only                   |     |     |    | v     |
| ACTG1    | NM_001199954.1 | 102560 | Actin $\gamma$ 1                                                                      | 2123    | 6          | CDS only                   | v   |     |    |       |
| ATP6V1B1 | NM_001692.3    | 192132 | Lysosomal ATPase, H+ transporting, V1 subunit B1                                      | 1956    | 14         | CDS only                   |     |     |    | v     |
| ATP6V1B2 | NM_001693.3    | 606939 | Lysosomal ATPase, H+ transporting, V1 subunit B2                                      | 3054    | 14         | CDS only                   |     |     |    | v     |
| BCS1L    | NM_001079866.1 | 603647 | Ubiquinol-cytochrome c reductase synthesis-like                                       | 1454    | 8          | CDS only                   |     |     |    | v     |
| BSND     | NM_057176.2    | 606412 | Bartrter syndrome, infantile, with sensorineural deafness                             | 1396    | 4          | CDS only                   |     | v   |    |       |
| CATSPER2 | NM_001282310.1 | 607249 | Cation channel, sperm associated 2                                                    | 1755    | 13         | CDS only                   |     |     |    | v     |
| CCDC50   | NM_178335.2    | 611051 | Coiled-coil domain containing 50                                                      | 8949    | 12         | CDS only                   | v   |     |    |       |
| CDH23    | NM_022124.5    | 605516 | Cadherin-related 23                                                                   | 11134   | 70         | CDS only                   |     | v   |    |       |
| CEACAM16 | NM_001039213.2 | 614591 | Carcinoembryonic antigen-related cell adhesion molecule 16                            | 1692    | 7          | CDS only                   | v   |     |    |       |
| CLDN14   | NM_001146077.1 | 605608 | Claudin 14                                                                            | 1469    | 3          | CDS only                   |     | v   |    |       |
| CLRN1    | NM_174878.2    | 606397 | Clarín 1                                                                              | 2359    | 8          | CDS only                   |     | v   |    |       |
| COCH     | NM_001135058.1 | 603196 | Cochlin                                                                               | 2882    | 11         | CDS only                   | v   |     |    |       |
| COL11A2  | NM_080680.2    | 120290 | Collagen, type XI, $\alpha$ 2                                                         | 6425    | 66         | CDS only                   |     | v   |    |       |
| COL9A2   | NM_001852.3    | 120260 | Collagen, type IX, $\alpha$ 2                                                         | 2831    | 32         | CDS only                   |     |     |    | v     |
| COL9A3   | NM_001853.3    | 120270 | Collagen, type IX, $\alpha$ 3                                                         | 2485    | 32         | CDS only                   |     |     |    | v     |
| CRYM     | NM_001888.3    | 123740 | Crystallin, mu                                                                        | 1506    | 10         | CDS only                   | v   |     |    |       |
| DFNA5    | NM_004403.2    | 608798 | Deafness, autosomal dominant 5                                                        | 2521    | 10         | CDS only                   | v   |     |    |       |
| DFNB31   | NM_001173425.1 | 607928 | Deafness, autosomal recessive 31 (Whirlin)                                            | 4076    | 12         | CDS only                   |     | v   |    |       |
| DFNB59   | NM_001042702.3 | 610219 | Deafness, autosomal recessive 59                                                      | 1534    | 7          | CDS only                   |     | v   |    |       |
| DIAPH1   | NM_005219.4    | 602121 | Diaphanous-related formin 1                                                           | 5804    | 28         | CDS only                   | v   |     |    |       |
| DSPP     | NM_014208.3    | 125485 | Dentin sialophosphoprotein                                                            | 4331    | 5          | CDS only                   | v   |     |    |       |
| ECE1     | NM_001397.2    | 600423 | Endothelin converting enzyme 1                                                        | 5114    | 19         | CDS only                   |     |     |    | v     |
| EDNRA    | NM_001957.3    | 131243 | Endothelin receptor type A                                                            | 4168    | 8          | CDS only                   |     |     |    | v     |
| EDNRB    | NM_000115.3    | 131244 | Endothelin receptor type B                                                            | 4296    | 8          | CDS only                   |     |     |    | v     |
| ERCC2    | NM_000400.3    | 126340 | Excision repair cross-complementing rodent repair deficiency, complementation group 2 | 2568    | 23         | CDS only                   |     |     |    | v     |
| ERCC3    | NM_000122.1    | 133510 | Excision repair cross-complementing rodent repair deficiency, complementation group 3 | 2751    | 15         | CDS only                   |     |     |    | v     |
| ESPN     | NM_031475.2    | 606351 | Espin                                                                                 | 3531    | 13         | CDS only                   |     | v   |    |       |
| ESRRB    | NM_004452.3    | 602167 | Estrogen-related receptor $\beta$                                                     | 3029    | 11         | CDS only                   |     | v   |    |       |
| EYA4     | NM_004100.4    | 603550 | Eyes absent homolog 4                                                                 | 5697    | 20         | CDS only                   | v   |     |    |       |
| FAS      | NM_000043.4    | 134637 | Fas cell surface death receptor                                                       | 2755    | 9          | CDS only                   |     |     |    | v     |
| FGF3     | NM_005247.2    | 164950 | Fibroblast growth factor 3                                                            | 1548    | 3          | CDS only                   |     |     |    | v     |
| FGFR3    | NM_000142.4    | 134934 | Fibroblast growth factor receptor 3                                                   | 4304    | 18         | CDS only                   | v   |     |    |       |
| FOXI1    | NM_012188.4    | 601093 | Forkhead box I1                                                                       | 2296    | 2          | CDS only                   |     | v   |    |       |
| GATA3    | NM_001002295.1 | 131320 | GATA binding protein 3                                                                | 3070    | 6          | CDS only                   |     |     |    | v     |
| GIPC3    | NM_133261.2    | 608792 | GIPC PDZ domain containing family, member 3                                           | 4317    | 6          | CDS only                   |     | v   |    |       |
| GJA1     | NM_000165.3    | 121014 | Gap junction protein, $\alpha$ 1                                                      | 3130    | 2          | CDS only                   |     | v   |    |       |
| GJB1     | NM_000166.5    | 304040 | Gap junction protein, $\beta$ 1                                                       | 1674    | 2          | CDS only                   |     |     |    | v     |
| GJB2     | NM_004004.5    | 121011 | Gap junction protein, $\beta$ 2                                                       | 2347    | 3          | Entire gene + 5kb upstream |     | v   |    |       |
| GJB3     | NM_001005752.1 | 603324 | Gap junction protein, $\beta$ 3                                                       | 1777    | 2          | CDS only                   | v   |     |    |       |

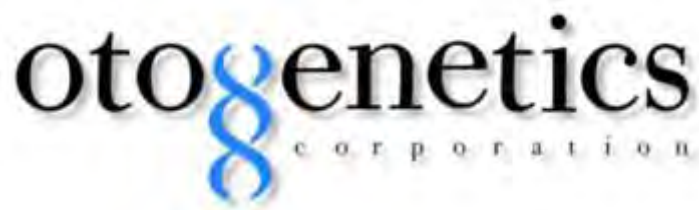

|          |                |        |                                                                      |       |    |                                 |   |   |
|----------|----------------|--------|----------------------------------------------------------------------|-------|----|---------------------------------|---|---|
| GJB4     | NM_153212.2    | 605425 | Gap junction protein, $\beta$ 4                                      | 2840  | 2  | CDS only                        |   | v |
| GJB6     | NM_001110219.2 | 604418 | Gap junction protein, $\beta$ 6                                      | 2178  | 5  | CDS only                        | v |   |
| GPR98    | NM_032119.3    | 602851 | G protein-coupled receptor 98                                        | 19333 | 90 | CDS only                        |   | v |
| GPSM2    | NM_013296.4    | 609245 | G-protein signaling modulator 2                                      | 3039  | 15 | CDS only                        |   | v |
| GRHL2    | NM_024915.3    | 608576 | Grainyhead-like 2                                                    | 5231  | 16 | CDS only                        | v |   |
| GRXCR1   | NM_001080476.2 | 613283 | Glutaredoxin, cysteine rich 1                                        | 1003  | 4  | CDS only                        |   | v |
| GSTP1    | NM_000852.3    | 134660 | Glutathione S-transferase $\pi$ 1                                    | 986   | 7  | CDS only                        |   | v |
| HAL      | NM_002108.3    | 609457 | Histidine ammonia-lyase                                              | 3927  | 21 | CDS only                        |   | v |
| HGF      | NM_000601.4    | 142409 | Hepatocyte growth factor                                             | 2820  | 18 | CDS only                        |   | v |
| ILDR1    | NM_001199799.1 | 609739 | Immunoglobulin-like domain containing receptor 1                     | 2908  | 8  | CDS only                        |   | v |
| JAG1     | NM_000214.2    | 601920 | Jagged 1                                                             | 5988  | 26 | CDS only                        |   | v |
| KCNE1    | NM_000219.4    | 176261 | Potassium voltage-gated channel, Isk-related family, member 1        | 3575  | 4  | CDS only                        |   | v |
| KCNJ10   | NM_002241.4    | 602208 | Potassium inwardly-rectifying channel, subfamily J, member 10        | 5323  | 2  | CDS only                        |   | v |
| KCNQ1    | NM_000218.2    | 607542 | Potassium voltage-gated channel, KQT-like subfamily, member 1        | 3262  | 16 | CDS only                        |   | v |
| KCNQ4    | NM_004700.3    | 603537 | Potassium voltage-gated channel, KQT-like subfamily, member 4        | 4116  | 14 | CDS only                        | v |   |
| KIAA1199 | NM_018689.1    | 608366 | KIAA1199                                                             | 7080  | 29 | CDS only                        |   | v |
| LHFPL5   | NM_182548.3    | 609427 | Lipoma HMGIC fusion partner-like 5                                   | 2147  | 4  | CDS only                        |   | v |
| LHX3     | NM_014564.3    | 600577 | LIM homeobox 3                                                       | 2419  | 6  | CDS only                        |   | v |
| LOXHD1   | NM_144612.6    | 613072 | Lipoxygenase homology domains 1                                      | 6854  | 40 | Chr18:<br>44152049-<br>44152125 |   | v |
| LRTOMT   | NM_001145309.3 | 612414 | Leucine rich transmembrane and O-methyltransferase domain containing | 3844  | 9  | CDS only                        |   | v |
| MARVELD2 | NM_001038603.2 | 610572 | MARVEL domain containing 2                                           | 2297  | 7  | CDS only                        |   | v |
| mir182   | NR_029614.1    | 611607 | microRNA 182                                                         | 110   | 1  | CDS only                        |   | v |
| mir183   | NR_029615.1    | 611608 | microRNA 183                                                         | 110   | 1  | CDS only                        |   | v |
| mir96    | NR_029512.1    | 611606 | microRNA 96                                                          | 78    | 1  | CDS only                        | v |   |
| MITF     | NM_198159.2    | 156845 | Microphthalmia-associated transcription factor                       | 4815  | 10 | CDS only                        |   | v |
| MSRB3    | NM_198080.3    | 613719 | Methionine sulfoxide reductase B3                                    | 4307  | 6  | CDS only                        |   | v |
| MTAP     | NM_002451.3    | 156540 | Methylthioadenosine phosphorylase                                    | 4937  | 8  | CDS only                        |   | v |
| MT-TD    | NC_012920.1    | 590015 | Mitochondrial transfer RNA aspartic acid                             | 68    | 1  | CDS only                        |   | v |
| MT-TH    | NC_012920.1    | 590040 | Mitochondrial transfer RNA histidine                                 | 69    | 1  | CDS only                        |   | v |
| MT-TI    | NC_012920.1    | 590045 | Mitochondrial transfer RNA isoleucine                                | 69    | 1  | CDS only                        |   | v |
| MT-TK    | NC_012920.1    | 590060 | Mitochondrial transfer RNA lysine                                    | 70    | 1  | CDS only                        |   | v |
| MT-TL1   | NC_012920.1    | 590050 | Mitochondrial transfer RNA leucine                                   | 75    | 1  | CDS only                        |   | v |
| MT-L2    | NC_012920.1    | 590055 | Mitochondrial transfer RNA leucine2                                  | 71    | 1  | CDS only                        |   | v |
| MT-TM    | NC_012920.1    | 590065 | Mitochondrial transfer RNA methionine                                | 68    | 1  | CDS only                        |   | v |
| MT-TQ    | NC_012920.1    | 590030 | Mitochondrial transfer RNA glutamine                                 | 72    | 1  | CDS only                        |   | v |
| MT-TS1   | NC_012920.1    | 590080 | Mitochondrial transfer RNA serine 1                                  | 69    | 1  | CDS only                        |   | v |
| MT-TS2   | NC_012920.1    | 590085 | Mitochondrial transfer RNA serine 2                                  | 59    | 1  | CDS only                        |   | v |
| MYH14    | NM_001145809.1 | 608568 | Myosin, heavy chain 14, non-muscle                                   | 6930  | 43 | CDS only                        | v |   |
| MYH9     | NM_002473.4    | 160775 | Myosin, heavy chain 9, non-muscle                                    | 7505  | 41 | CDS only                        | v |   |
| MYO15A   | NM_016239.3    | 602666 | Myosin XVA                                                           | 11876 | 66 | CDS only                        |   | v |
| MYO1A    | NM_001256041.1 | 601478 | Myosin IA                                                            | 3658  | 29 | CDS only                        | v |   |
| MYO1C    | NM_001080779.1 | 606538 | Myosin IC                                                            | 4973  | 32 | CDS only                        |   | v |
| MYO1F    | NM_012335.3    | 601480 | Myosin IF                                                            | 4173  | 28 | CDS only                        |   | v |

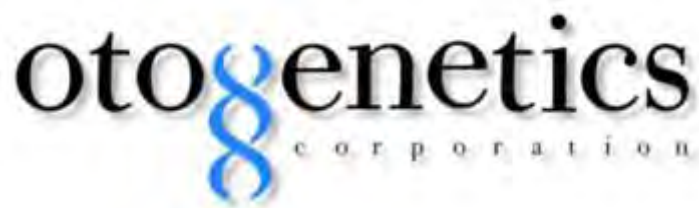

|          |                |        |                                                                      |      |    |                                                           |   |
|----------|----------------|--------|----------------------------------------------------------------------|------|----|-----------------------------------------------------------|---|
| MYO3A    | NM_017433.4    | 606808 | Myosin IIIA                                                          | 5798 | 35 | CDS only                                                  | v |
| MYO6     | NM_004999.3    | 600970 | Myosin IV                                                            | 8662 | 35 | CDS only                                                  | v |
| MYO7A    | NM_000260.3    | 276903 | Myosin 7A                                                            | 7465 | 49 | CDS only                                                  | v |
| NDP      | NM_000266.3    | 300658 | Norrie disease                                                       | 2058 | 3  | CDS only                                                  | v |
| NR2F1    | XM_005272070.1 | 132890 | Nuclear receptor subfamily 2, group F, member 1                      | 1983 | ND | CDS only                                                  | v |
| OTOA     | NM_144672.3    | 607038 | Otoancorin                                                           | 3624 | 28 | CDS only                                                  | v |
| OTOF     | NM_194248.2    | 603681 | Otoferlin                                                            | 7171 | 47 | CDS only                                                  | v |
| OTOR     | NM_020157.3    | 606067 | Otoraplin                                                            | 1482 | 4  | CDS only                                                  | v |
| P2RX2    | NM_170683.3    | 600844 | Purinergic receptor P2X, ligand-gated ion channel, 2                 | 1945 | 10 | CDS only                                                  | v |
| PAX3     | NM_181457.3    | 606597 | Paired box 3                                                         | 2032 | 8  | CDS only                                                  | v |
| PCDH15   | NM_001142763.1 | 605514 | Protocadherin-related 15                                             | 7042 | 33 | CDS only                                                  | v |
| PDZD7    | NM_001195263.1 | 612971 | PDZ domain-containing 7                                              | 4164 | 17 | CDS only                                                  | v |
| PMP22    | NM_000304.3    | 601097 | Peripheral myelin protein 22                                         | 1861 | 5  | CDS only                                                  | v |
| POU3F4   | NM_000307.4    | 300039 | POU class 3 homeobox 4                                               | 1507 | 1  | CDS only                                                  | v |
| POU4F3   | NM_002700.2    | 602460 | POU class 4 homeobox 3                                               | 1182 | 2  | CDS only                                                  | v |
| PRPS1    | NM_002764.3    | 311850 | Phosphoribosyl pyrophosphate synthetase 1                            | 2156 | 7  | CDS only                                                  | v |
| PTPRQ    | NM_001145026.1 | 603317 | Protein tyrosine phosphatase, receptor type, Q                       | 8066 | 3  | Chr12:<br>80849273-<br>80849842;<br>80878212-<br>80878383 | v |
| RDX      | NM_001260492.1 | 179410 | Radixin                                                              | 2761 | 14 | CDS only                                                  | v |
| SERPINB6 | NM_004568.5    | 173321 | Serpin peptidase inhibitor, clade B (ovalbumin), member 6            | 1932 | 7  | CDS only                                                  | v |
| SIX1     | NM_005982.3    | 601205 | SIX homeobox 1                                                       | 2687 | 2  | CDS only                                                  | v |
| SIX5     | NM_175875.4    | 600963 | SIX homeobox 5                                                       | 3352 | 3  | CDS only                                                  | v |
| SLC17A8  | NM_139319.2    | 607557 | Solute carrier family 17 (vesicular glutamate transporter), member 8 | 3983 | 12 | CDS only                                                  | v |
| SLC26A4  | NM_000441.1    | 605646 | Solute carrier family 26 (anion exchanger), member 4                 | 4930 | 21 | CDS only                                                  | v |
| SLC26A5  | NM_198999.2    | 604943 | Solute carrier family 26 (anion exchanger), member 5                 | 2697 | 20 | CDS only                                                  | v |
| SLC4A11  | NM_001174090.1 | 610206 | Solute carrier family 4, sodium borate transporter, member 11        | 3268 | 20 | CDS only                                                  | v |
| SMPX     | NM_014332.2    | 300226 | Small muscle protein, X-linked                                       | 951  | 5  | CDS only                                                  | v |
| SNAI2    | NM_003068.4    | 602150 | Snail family zinc finger 2                                           | 2112 | 3  | CDS only                                                  | v |
| SOX2     | NM_003106.3    | 184429 | SRY (sex determining region Y)-box 2                                 | 2520 | 1  | CDS only                                                  | v |
| SPINK5   | NM_001127698.1 | 605010 | Serine peptidase inhibitor, Kazal type 5                             | 3745 | 34 | CDS only                                                  | v |
| STRC     | NM_153700.2    | 606440 | Stereocilin                                                          | 5515 | 29 | CDS only                                                  | v |
| TBL1X    | NM_005647.3    | 300196 | Transducin (β)-like 1X-linked                                        | 5715 | 18 | CDS only                                                  | v |
| TCF21    | NM_198392.2    | 603306 | Transcription factor 21                                              | 3249 | 3  | CDS only                                                  | v |
| TECTA    | NM_005422.2    | 602574 | Tectorin α                                                           | 6468 | 23 | CDS only                                                  | v |
| TFCP2    | NM_005653.4    | 189889 | Transcription factor CP2                                             | 3715 | 15 | CDS only                                                  | v |
| TIMM8A   | NM_004085.3    | 300356 | Translocase of inner mitochondrial membrane 8 homolog A              | 1459 | 2  | CDS only                                                  | v |
| TJP2     | NM_004817.3    | 607709 | Tight junction protein 2                                             | 4725 | 23 | CDS only                                                  | v |
| TMC1     | NM_138691.2    | 606706 | Transmembrane channel-like 1                                         | 3201 | 24 | CDS only                                                  | v |
| TMIE     | NM_147196.2    | 607237 | Transmembrane inner ear                                              | 1861 | 4  | CDS only                                                  | v |
| TMPRSS3  | NM_024022.2    | 605511 | Transmembrane protease, serine 3                                     | 2463 | 13 | CDS only                                                  | v |
| TMPRSS5  | NM_030770.2    | 606751 | Transmembrane protease, serine 5                                     | 2233 | 13 | CDS only                                                  | v |
| TPRN     | NM_001128228.2 | 613354 | Taperin                                                              | 2641 | 4  | CDS only                                                  | v |

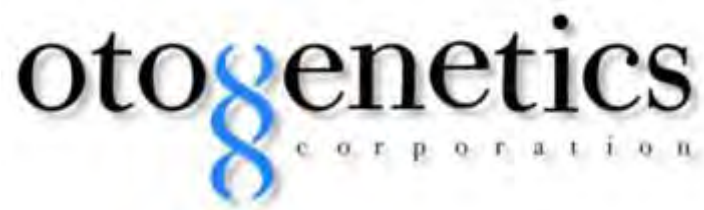

|        |                |        |                                  |       |    |          |   |
|--------|----------------|--------|----------------------------------|-------|----|----------|---|
| TRIOBP | NM_001039141.2 | 609761 | TRIO and F-actin binding protein | 10159 | 24 | CDS only | v |
| USH1C  | NM_153676.3    | 605242 | Usher syndrom 1C                 | 3246  | 28 | CDS only | v |
| USH1G  | NM_173477.3    | 607696 | Usher syndrome 1G                | 3568  | 3  | CDS only | v |
| USH2A  | NM_206933.2    | 608400 | Usher syndrome 2A                | 18883 | 72 | CDS only | v |
| WFS1   | NM_006005.3    | 606201 | Wolfram syndrome 1               | 3640  | 8  | CDS only | v |

\* Inheritance pattern: AD = autosomal dominant  
AR = autosomal recessive  
X = X-linked  
Syn = syndromic deafness
